# Supplementary material for: „Ich bin und bleibe DDR-Bürger“. Die Entwicklung der identifikativen Akkulturation im Lebensverlauf von 1972 und 1973 in Sachsen Geborenen
Source: publisher site journal article supplement (doi:10.1515/zfsoz-2025-2020), 2025-08-27

# **„Ich bin und bleibe DDR-Bürger“. Die Entwicklung der identifikativen Akkulturation im Lebensverlauf von 1972 und 1973 geborenen Sachsen**

“I am and will remain a GDR citizen”. The development of identifying acculturation over the life course of Saxons born in 1972 and 1973

## **Online-Anhang / Online Appendix**

**Rolf Becker**

Universität Bern, Abteilung Bildungssoziologie, Fabrikstrasse 8, CH-3012 Bern, Schweiz;  
rolf.becker@unibe.ch

## **Inhalt**

**Tabelle A.1:** Panelmortalität nach Modi identifikativer Akkulturation

**Tabelle A.2:** „Mauer in den Köpfen“ versus Einheit in den Köpfen – Entwicklung von 1996–2022

**Tabelle A.3:** Kollektive Identität als Ostdeutsche – Entwicklung von 1996–2022

**Tabelle A.4:** Deskriptive Statistiken

**Abbildung A.1:** Identifikative Akkulturation als Zustand (d.h. Verteilung im Jahr) und Prozess (d.h. jährlicher Wechsel)

**Abbildung A.2:** Entwicklung der sozialen Identität als Ostdeutsche

**Tabelle A.1:** Panelmortalität nach Modi identifikativer Akkulturation

|                                                    | Modell              | 1                   | 2 |
|----------------------------------------------------|---------------------|---------------------|---|
| <i>Akkulturationsmodi (Ref.: Marginalisierung)</i> |                     |                     |   |
| Mehrfachintegration                                | 0,513**<br>(0,115)  | 0,553*<br>(0,138)   |   |
| Separation                                         | 0,641†<br>(0,152)   | 0,742<br>(0,196)    |   |
| Assimilation                                       | 0,601*<br>(0,148)   | 0,613†<br>(0,169)   |   |
| <i>Studienmerkmale</i>                             |                     |                     |   |
| Anzahl vorhergehender Panelwellen                  | 0,854***<br>(0,022) |                     |   |
| Anzahl vorhergehender Panelwellen <sup>2</sup>     | 1,001***<br>(0,001) |                     |   |
| <i>Historische Perioden (Ref.: 1995–2009)</i>      |                     |                     |   |
| 1992–1994                                          |                     | 1,137<br>(0,231)    |   |
| 2010–2022                                          |                     | 5,356***<br>(0,521) |   |
| Fallzahl                                           | 9.002               | 9.002               |   |
| Panelmortalität in %                               | 6,8                 | 6,8                 |   |
| Pseudo-R <sup>2</sup>                              | 0,2460              | 0,0813              |   |

Binäre logistische Regression (Marginal Odds Ratio [Jann & Karlson 2023]; in Klammern: robuste Standardfehler).

\* p < 0,05; \*\* p < 0,01; \*\*\* p < 0,001; † p < 0,1.

Daten: SLS (Welle 7–33) – eigene Berechnungen.

**Tabelle A.2:** „Mauer in den Köpfen“ versus Einheit in den Köpfen – Entwicklung von 1996–2022

|                                        | „Mauer in den Köpfen“ | „Mauer in den Köpfen“ (t+1) |                      |
|----------------------------------------|-----------------------|-----------------------------|----------------------|
|                                        |                       | <i>random effects</i>       | <i>fixed effects</i> |
| <i>Zeitdimensionen (t)</i>             |                       |                             |                      |
| Lebensalter                            | –0,009***<br>(0,002)  | –0,008***<br>(0,002)        | –0,008***<br>(0,002) |
| Arbeitslosenquoten in Sachsen          | 0,005*<br>(0,003)*    | 0,001<br>(0,003)            | 0,001<br>(0,002)     |
| Identifikation mit DDR (1989)          | 0,077***<br>(0,014)   | 0,061*<br>(0,027)           |                      |
| <i>Einstellungen (t)</i>               |                       |                             |                      |
| „Mauer in den Köpfen“ (Innere Einheit) |                       | 0,226***<br>(0,023)         | 0,053*<br>(0,026)    |
| Fallzahl                               | 5.505                 | 4.035                       | 3.001                |
| Pseudo-R <sup>2</sup>                  | 0,0413                | 0,2475                      | 0,0515               |

Binäre logistische (Panel-)Regression (AME; in Klammern: robuste Standardfehler; Referenzkategorie: Exklusion).

\* p < 0,05; \*\* p < 0,01; \*\*\* p < 0,001.

Daten: Sächsische Längsschnittstudie (Welle 19–33: 2005–2022) – eigene Berechnungen.

**Tabelle A3:** Kollektive Identität als Ostdeutsche – Entwicklung von 1996–2022

| Modell                    | 1                   | 2                   |
|---------------------------|---------------------|---------------------|
| <i>Identität</i>          |                     |                     |
| Bürger/in der DDR         | 0,151***<br>(0,012) |                     |
| Deutsche/r                | 0,025<br>(0,018)    | 0,025<br>(0,018)    |
| Sachse / Sächsin          | 0,134***<br>(0,015) | 0,133***<br>(0,015) |
| <i>Akkulturationsmodi</i> |                     |                     |
| Marginalisierung          |                     | <i>Referenz</i>     |
| Mehrfachintegration       |                     | 0,250***<br>(0,040) |
| Separation                |                     | 0,258***<br>(0,041) |
| Assimilation              |                     | 0,051<br>(0,042)    |
| <i>Periode</i>            |                     |                     |
| (Log) BIP in Sachsen      | 0,092***<br>(0,024) | 0,090***<br>(0,024) |
| Fallzahl                  | 5.361               | 5.346               |
| Pseudo-R <sup>2</sup>     | 0,0219              | 0,0226              |

Binäre logistische Panelregression (AME; in Klammern: robuste Standardfehler, geclustert nach Befragte).

\* p &lt; 0,05; \*\* p &lt; 0,01; \*\*\* p &lt; 0,001.

Daten: Sächsische Längsschnittstudie (Welle 12–33: 1996–2022) – eigene Berechnungen.

**Tabelle A.4:** Deskriptive Statistiken

| Variable                               | Fallzahl | Mittelwert<br>bzw.<br>Prozente | Standard-<br>abweichung | Minimum | Maximum |
|----------------------------------------|----------|--------------------------------|-------------------------|---------|---------|
| <b>Tabelle 2 (Modell 1)</b>            |          |                                |                         |         |         |
| <i>Akkulturation (t)</i>               | 7.425    | 100%                           |                         | 1       | 3       |
| Mehrfachintegration                    | 5.399    | 72,7%                          |                         | 0       | 1       |
| Assimilation                           | 836      | 11,3%                          |                         | 0       | 1       |
| Separation/Marginalisierung            | 1.190    | 16,0%                          |                         | 0       | 1       |
| Lebensalter                            | 7.425    | 34,1                           | 8,3                     | 20      | 57      |
| Arbeitslosenquote in Sachsen           | 7.425    | 14,1                           | 4,9                     | 5,5     | 20      |
| Identifikation mit DDR (1989)          | 7.425    | 66,9%                          |                         | 0       | 1       |
| Zuversicht: Persönliche Zukunft        | 7.425    | 71,4%                          |                         | 0       | 1       |
| Zuversicht: Ostdeutsche Entwicklung    | 7.425    | 30,3%                          |                         | 0       | 1       |
| Bedrohung: eigene Arbeitslosigkeit     | 7.425    | 27,4%                          |                         | 0       | 1       |
| Bedrohung: Verteuerung des Lebens      | 7.425    | 80,3%                          |                         | 0       | 1       |
| <b>Tabelle 2 (Modell 2)</b>            |          |                                |                         |         |         |
| <i>Akkulturation (t+1)</i>             | 6.931    | 100%                           |                         | 1       | 3       |
| Mehrfachintegration                    | 5.109    | 73,7%                          |                         | 0       | 1       |
| Assimilation                           | 731      | 10,6%                          |                         | 0       | 1       |
| Separation/Marginalisierung            | 1.091    | 15,7%                          |                         | 0       | 1       |
| <i>Akkulturation (t)</i>               | 6.931    | 100%                           |                         | 1       | 3       |
| Mehrfachintegration                    | 5.029    | 72,6%                          |                         | 0       | 1       |
| Assimilation                           | 796      | 11,5%                          |                         | 0       | 1       |
| Separation/Marginalisierung            | 1.106    | 16,0%                          |                         | 0       | 1       |
| Lebensalter                            | 6.931    | 33,3                           | 7,7                     | 20      | 55      |
| Arbeitslosenquote in Sachsen           | 6.931    | 14,5                           | 4,7                     | 5,5     | 20      |
| Identifikation mit DDR (1989)          | 6.931    | 66,8%                          |                         | 0       | 1       |
| Zuversicht: Persönliche Zukunft        | 6.931    | 72,3%                          |                         | 0       | 1       |
| Zuversicht: Ostdeutsche Entwicklung    | 6.931    | 30,4%                          |                         | 0       | 1       |
| Bedrohung: eigene Arbeitslosigkeit     | 6.931    | 28,0%                          |                         | 0       | 1       |
| Bedrohung: Verteuerung des Lebens      | 6.931    | 80,1%                          |                         | 0       | 1       |
| <b>Tabelle 3 (Modell 1)</b>            |          |                                |                         |         |         |
| <i>Akkulturation</i>                   | 2.292    | 100%                           |                         | 1       | 3       |
| Mehrfachintegration                    | 1.782    | 77,8%                          |                         | 0       | 1       |
| Assimilation                           | 192      | 8,3%                           |                         | 0       | 1       |
| Separation/Marginalisierung            | 318      | 13,9%                          |                         | 0       | 1       |
| Lebensalter                            | 2.292    | 41,0                           | 7,2                     | 31      | 57      |
| Arbeitslosenquote in Sachsen           | 2.292    | 11,4                           | 6,1                     | 5,5     | 20      |
| Identifikation mit DDR (1989)          | 2.292    | 68,2%                          |                         | 0       | 1       |
| Vorherige (eigene) Arbeitslosigkeit    | 2.292    | 69,7%                          |                         | 0       | 1       |
| Deutsche zweiter Klasse                | 2.292    | 36,2%                          |                         | 0       | 1       |
| Verlierer/in der deutschen Einheit     | 2.292    | 37,2%                          |                         | 0       | 1       |
| „Mauer in den Köpfen“ (Innere Einheit) | 2.292    | 34,3%                          |                         | 0       | 1       |
| <b>Tabelle 3 (Modell 2)</b>            |          |                                |                         |         |         |
| <i>Akkulturation (t+1)</i>             | 1.911    | 100%                           |                         | 1       | 3       |
| Mehrfachintegration                    | 1.505    | 78,8%                          |                         | 0       | 1       |
| Assimilation                           | 143      | 7,5%                           |                         | 0       | 1       |
| Separation/Marginalisierung            | 263      | 13,7%                          |                         | 0       | 1       |
| <i>Akkulturation (t)</i>               | 1.911    | 100%                           |                         | 1       | 3       |
| Mehrfachintegration                    | 1.484    | 78,7%                          |                         | 0       | 1       |
| Assimilation                           | 165      | 8,6%                           |                         | 0       | 1       |
| Separation/Marginalisierung            | 262      | 13,7%                          |                         | 0       | 1       |
| Lebensalter                            | 1.911    | 39,5                           | 6,7                     | 31      | 55      |
| Arbeitslosenquote in Sachsen           | 1.911    | 12,4                           | 6,1                     | 5,5     | 20      |
| Identifikation mit DDR (1989)          | 1.911    | 67,8%                          |                         | 0       | 1       |
| Vorherige (eigene) Arbeitslosigkeit    | 1.911    | 69,7%                          |                         | 0       | 1       |
| Deutsche zweiter Klasse                | 1.911    | 37,8%                          |                         | 0       | 1       |
| Verlierer/in der deutschen Einheit     | 1.911    | 39,4%                          |                         | 0       | 1       |
| „Mauer in den Köpfen“ (Innere Einheit) | 1.911    | 34,4%                          |                         | 0       | 1       |

**Tabelle 4 (Modell 1)**

|                                             |       |       |     |     |    |
|---------------------------------------------|-------|-------|-----|-----|----|
| <i>Akkulturation</i>                        | 5.596 | 100%  |     | 1   | 3  |
| Mehrfachintegration                         | 4.035 | 72,1% |     | 0   | 1  |
| Assimilation                                | 638   | 11,4% |     | 0   | 1  |
| Separation/Marginalisierung                 | 923   | 16,5% |     | 0   | 1  |
| Lebensalter                                 | 5.596 | 32,5  | 7,2 | 20  | 55 |
| Arbeitslosenquote in Sachsen                | 5.596 | 15,3  | 4,5 | 5,5 | 20 |
| Identifikation mit DDR (1989)               | 5.596 | 66,2% |     | 0   | 1  |
| <i>Soziale und politische Einstellungen</i> |       |       |     |     |    |
| Links-Rechts-Orientierung                   | 5.596 | 2,8   | 0,8 | 1   | 5  |
| Befürwortung der Vereinigung                | 5.596 | 87,1% |     | 0   | 1  |
| Zurechtkommen mit neuer Gesellschaft        | 5.596 | 75,6% |     | 0   | 1  |
| <i>Zufriedenheit mit...</i>                 |       |       |     |     |    |
| Politischem System der Bundesrepublik       | 5.596 | 29,6% |     | 0   | 1  |
| Wirtschaftsordnung                          | 5.596 | 34,5% |     | 0   | 1  |
| Einkommen                                   | 5.596 | 62,2% |     | 0   | 1  |
| Politischem Einfluss                        | 5.596 | 35,3% |     | 0   | 1  |

**Tabelle 4 (Modell 2)**

|                                       |       |       |     |     |    |
|---------------------------------------|-------|-------|-----|-----|----|
| <i>Akkulturation (t+1)</i>            | 5.470 | 100%  |     | 1   | 3  |
| Mehrfachintegration                   | 4.025 | 73,6% |     | 0   | 1  |
| Assimilation                          | 588   | 10,7% |     | 0   | 1  |
| Separation/Marginalisierung           | 857   | 15,7% |     | 0   | 1  |
| <i>Akkulturation (t)</i>              | 5.470 | 100%  |     | 1   | 3  |
| Mehrfachintegration                   | 3.946 | 72,1% |     | 0   | 1  |
| Assimilation                          | 628   | 11,5% |     | 0   | 1  |
| Separation/Marginalisierung           | 896   | 16,4% |     | 0   | 1  |
| Lebensalter                           | 5.470 | 32,4  | 7,1 | 20  | 55 |
| Arbeitslosenquote in Sachsen          | 5.470 | 15,4  | 4,4 | 5,5 | 20 |
| Identifikation mit DDR (1989)         | 5.470 | 66,2% |     | 0   | 1  |
| <i>Politische Einstellungen</i>       |       |       |     |     |    |
| Links-Rechts-Orientierung             | 5.470 | 2,8   | 0,8 | 1   | 5  |
| Befürwortung der Vereinigung          | 5.470 | 87,1% |     | 0   | 1  |
| Zurechtkommen mit neuer Gesellschaft  |       | 75,8% |     | 0   | 1  |
| <i>Zufriedenheit mit...</i>           |       |       |     |     |    |
| Politischem System der Bundesrepublik | 5.470 | 29,4% |     | 0   | 1  |
| Wirtschaftsordnung                    | 5.470 | 34,5% |     | 0   | 1  |
| Einkommen                             | 5.470 | 62,3% |     | 0   | 1  |
| Politischem Einfluss                  | 5.470 | 35,3% |     | 0   | 1  |

**Fortsetzung von Tabelle A.4**

| Variable                                                                                         | Frageformulierung                                                                                                                                                                                 | Antwortkategorien / Rekodierung                                                                                                                                                                                                                                                                                       |
|--------------------------------------------------------------------------------------------------|---------------------------------------------------------------------------------------------------------------------------------------------------------------------------------------------------|-----------------------------------------------------------------------------------------------------------------------------------------------------------------------------------------------------------------------------------------------------------------------------------------------------------------------|
| Kollektive Identität                                                                             | Nun zu Ihrem Zugehörigkeitsgefühl: Als was fühlen Sie sich? Als Bürger(in) der ehemaligen DDR? Als Bürger(in) der Bundesrepublik Deutschland?                                                     | 1 = ja, vollkommen; 2 = ja, etwas schon; 3 = nein, eigentlich nicht; 4 = nein, absolut nicht                                                                                                                                                                                                                          |
| Identifikative Akkulturation                                                                     | Nun zu Ihrem Zugehörigkeitsgefühl: Als was fühlen Sie sich? Bürger der ehemaligen DDR? Bürger der Bundesrepublik Deutschland?                                                                     | 1 = ja, vollkommen; 2 = ja, etwas schon; 3 = nein, eigentlich nicht; 4 = nein, absolut nicht<br>(Dichotomisierung mit 1 für 1 und 2 sowie mit 0 für 3 und 4)<br>Mehrfachintegration = 1 (DDR=1 & BRD=1)<br>Separation = 2 (DDR=1 & BRD=0)<br>Assimilation = 3 (DDR=0 & BRD=1)<br>Marginalisierung = 4 (DDR=0 & BRD=0) |
| Lebensalter                                                                                      | Ihr Alter?                                                                                                                                                                                        |                                                                                                                                                                                                                                                                                                                       |
| Arbeitslosenquote in Sachsen; Bruttoinlandprodukt in Sachsen                                     | Zeitreihen (Entnommen von der Website des Statistischen Landesamt Sachsen)                                                                                                                        |                                                                                                                                                                                                                                                                                                                       |
| Identifikation mit DDR (1989)                                                                    | Bitte geben Sie nun an, inwieweit Sie persönlich von jeder der folgenden Aussagen überzeugt sind. Ich fühle mich mit der DDR als meinem sozialistischen Vaterland eng verbunden.                  | 1 = vollkommen – 5 = überhaupt nicht<br>(Dichotomisierung mit 1 für 1 und 2 sowie mit 0 für 3, 4 und 5)                                                                                                                                                                                                               |
| Zuversicht: Persönliche Zukunft Ostdeutsche Entwicklung                                          | Wie zuversichtlich sehen Sie die Zukunft: für Sie persönlich? die Entwicklung in Ostdeutschland?                                                                                                  | 1 = sehr zuversichtlich – 5 überhaupt nicht zuversichtlich (Dichotomisierung mit 1 für 1 und 2 sowie mit 0 für 3, 4 und 5)                                                                                                                                                                                            |
| Bedrohung: eigene Arbeitslosigkeit Verteuerung des Lebens                                        | Inwieweit fühlen Sie sich durch das Folgende bedroht? (...) mögliche (erneute) eigene Arbeitslosigkeit. (...) zunehmende Verteuerung des Lebens                                                   | 1 = stark; 2 = eher stark; 3 = eher schwach; 4 = schwach (Dichotomisierung mit 1 für 1 und 2 sowie mit 0 für 3 und 4)                                                                                                                                                                                                 |
| Vorherige (eigene) Arbeitslosigkeit                                                              | Waren Sie seit der Wende arbeitslos (einschließlich eventueller jetziger Arbeitslosigkeit)?                                                                                                       | 1 = ja, mehrmals; 2 = ja, einmal; 3 = nein (Dichotomisierung mit 1 für 1 und 2 sowie mit 0 für 3)                                                                                                                                                                                                                     |
| Deutsche zweiter Klasse                                                                          | Viele Westdeutsche behandeln uns Ostdeutsche als Deutsche zweiter Klasse.                                                                                                                         | 1 = vollkommen – 5 = überhaupt nicht<br>(Dichotomisierung mit 1 für 1 und 2 sowie mit 0 für 3, 4 und 5)                                                                                                                                                                                                               |
| Verlierer/in der deutschen Einheit                                                               | Als was fühlen Sie sich: als Verlierer(in) der deutschen Einheit?                                                                                                                                 | 1 = ja, vollkommen; 2 = ja, etwas schon; 3 = nein, eigentlich nicht; 4 = nein, absolut nicht<br>(Dichotomisierung mit 1 für 1 und 2 sowie mit 0 für 3 und 4)                                                                                                                                                          |
| „Mauer in den Köpfen“ (Innere Einheit)                                                           | Gibt es gegenwärtig zwischen Ost- und Westdeutschen insgesamt gesehen mehr (1) Trennendes oder (2) mehr Gemeinsamkeiten?                                                                          | 1 = Trennendes; 2 = Gemeinsamkeiten<br>(Dichotomisierung mit 1 für 1 und 0 für 2)                                                                                                                                                                                                                                     |
| Politische Einstellungen: Links-Rechts-Orientierung                                              | Über Jahrzehnte eingebürgert, bei politischen Standortbestimmungen zwischen 'links' und 'rechts' zu unterscheiden. Wie ordnen Sie sich ein?                                                       | 1 = links; 2 = eher links als rechts; 3 = weder links noch rechts; 4 = eher rechts; 5 = rechts; 6 = Das weiß ich (noch) nicht (6 als fehlender Wert)                                                                                                                                                                  |
| Befürwortung der Vereinigung                                                                     | Wie stehen Sie zur Vereinigung? Im Frühjahr 1990 hatten wir Ihnen folgende Frage gestellt. Wie würden Sie heute antworten? Wie stehen Sie zur Vereinigung von DDR und BRD?                        | 1 = Ich bin sehr dafür; 2 = Ich bin eher dafür als dagegen; 3 = Ich bin eher dagegen als dafür; 4 = Ich bin sehr dagegen<br>(Dichotomisierung mit 1 für 1 und 2)                                                                                                                                                      |
| Zurechtkommen mit neuer Gesellschaft                                                             | Wie kommen Sie – alles in allem – mit den jetzigen gesellschaftlichen Verhältnissen zurecht?                                                                                                      | 1 = vollkommen – 5 = überhaupt nicht<br>(Dichotomisierung mit 1 für 1 und 2 sowie mit 0 für 3, 4 und 5)                                                                                                                                                                                                               |
| Zufriedenheiten: Politischem System der Bundesrepublik; Wirtschaftsordnung; Politischem Einfluss | Wie zufrieden sind Sie mit Folgendem? Mit dem politischen System der Bundesrepublik Deutschland? Mit der jetzigen Wirtschaftsordnung? Mit meinen Möglichkeiten zur Einflussnahme auf die Politik? | 1 = zufrieden; 2 = eher zufrieden; 3 = eher unzufrieden; 4 = unzufrieden<br>(Dichotomisierung mit 1 für 1 und 2 sowie 0 für 3 und 4)                                                                                                                                                                                  |
| Zufriedenheiten: Einkommen Politischem Einfluss                                                  | Zu einigen Seiten Ihrer Lebenszufriedenheit. Ich bin...mit meinem Einkommen...mit meinen Möglichkeiten zur Einflussnahme auf die Politik...zufrieden.                                             | 1 = zufrieden; 2 = eher zufrieden; 3 = eher unzufrieden; 4 = unzufrieden<br>(Dichotomisierung mit 1 für 1 und 2 sowie 0 für 3 und 4)                                                                                                                                                                                  |
| Kollektive Identitäten                                                                           | Nun zu Ihrem Zugehörigkeitsgefühl: Als was fühlen Sie sich? Ostdeutsche? Sachse?                                                                                                                  | 1 = ja, vollkommen; 2 = ja, etwas schon; 3 = nein, eigentlich nicht; 4 = nein, absolut nicht<br>(Dichotomisierung mit 1 für 1 und 2 sowie mit 0 für 3 und 4)                                                                                                                                                          |

**Abbildung A.1:** Identifikative Akkulturation als Zustand (d.h. Verteilung im Jahr) und Prozess (d.h. jährlicher Wechsel)

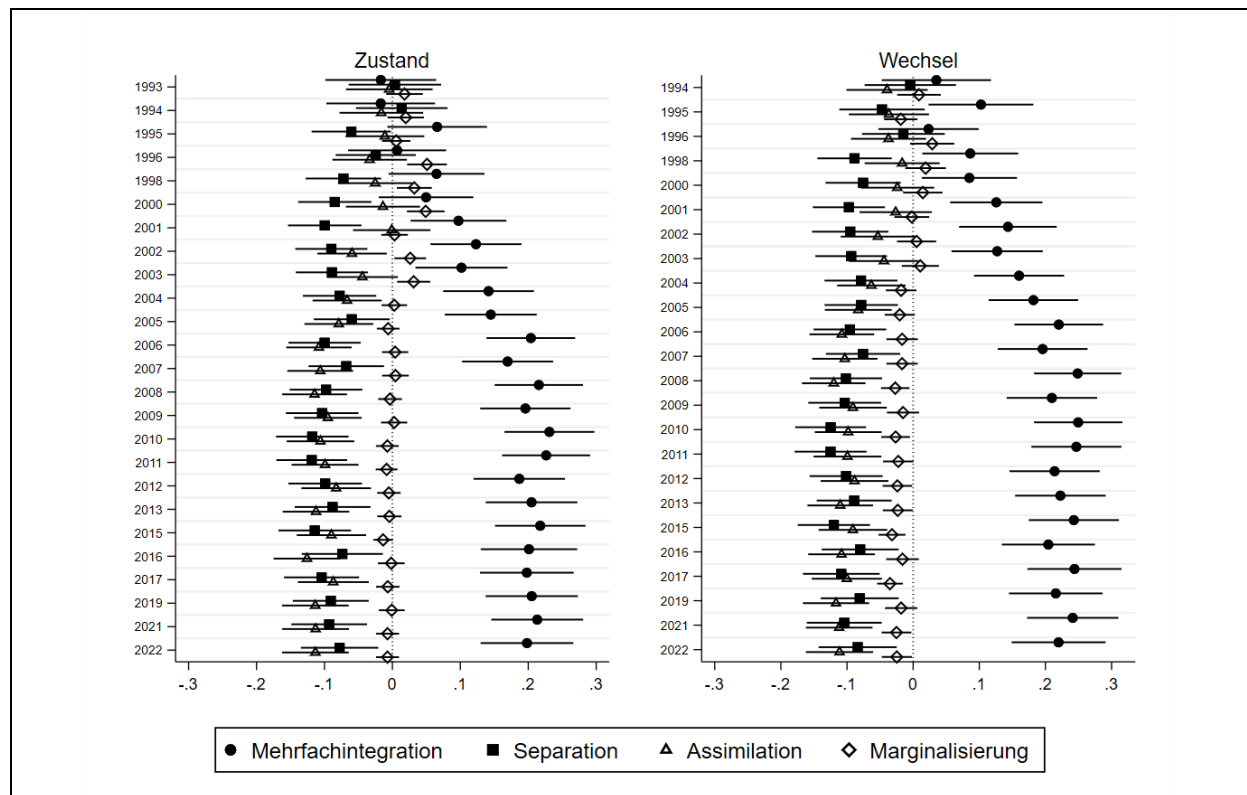



**Abbildung A.2:** Entwicklung der sozialen Identität als Ostdeutsche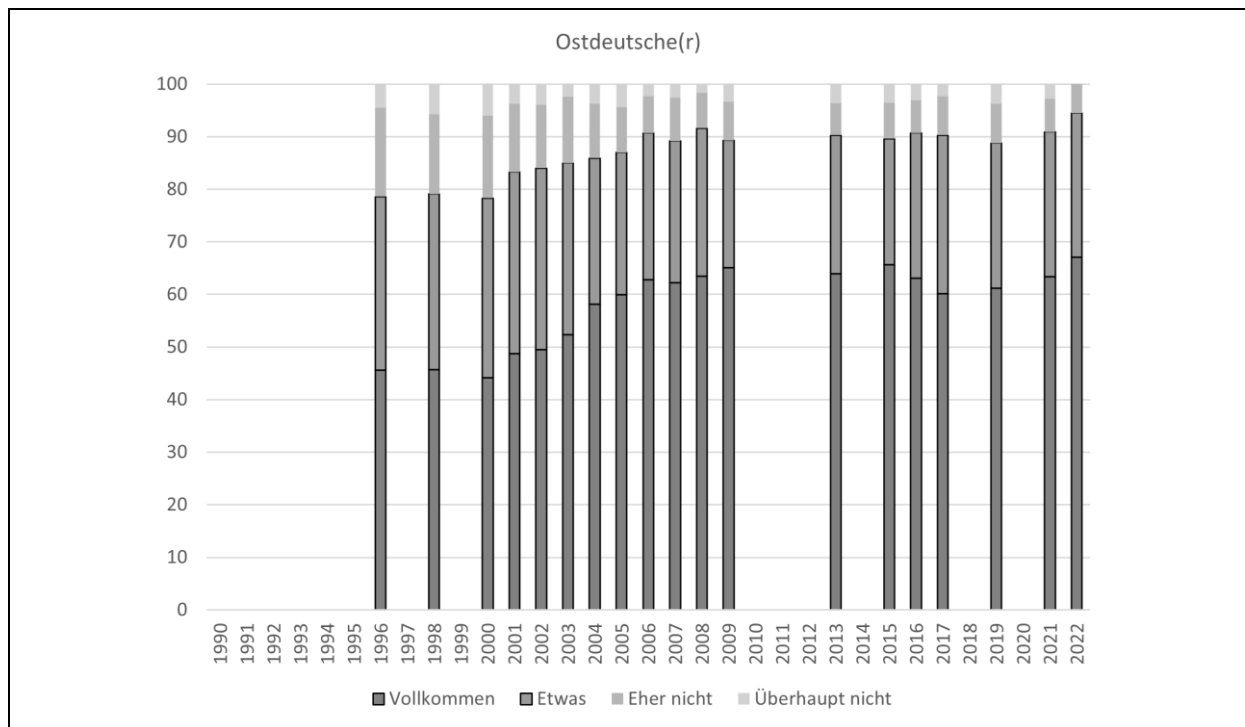

Supplement: Supplementary file 1 [file Becker_Online Anhang.pdf › Becker_Online Anhang.pdf]
